# Supplementary material for: Sequential gene expression analysis of cervical malignant transformation identifies RFC4 as a novel diagnostic and prognostic biomarker
Source: PubMed Central journal article supplement (PMC9648022; doi:10.1186/s12916-022-02630-8), 2022-11-09
Supplement: 12916_2022_2630_MOESM1_ESM.pdf [file 12916_2022_2630_MOESM1_ESM.pdf]

**Additional file 1**

**Sequential gene expression analysis of cervical malignant transformation identifies  
RFC4 as a novel diagnostic and prognostic biomarker**

*Jianwei Zhang, et al.*

## Supplementary Figures 1-10

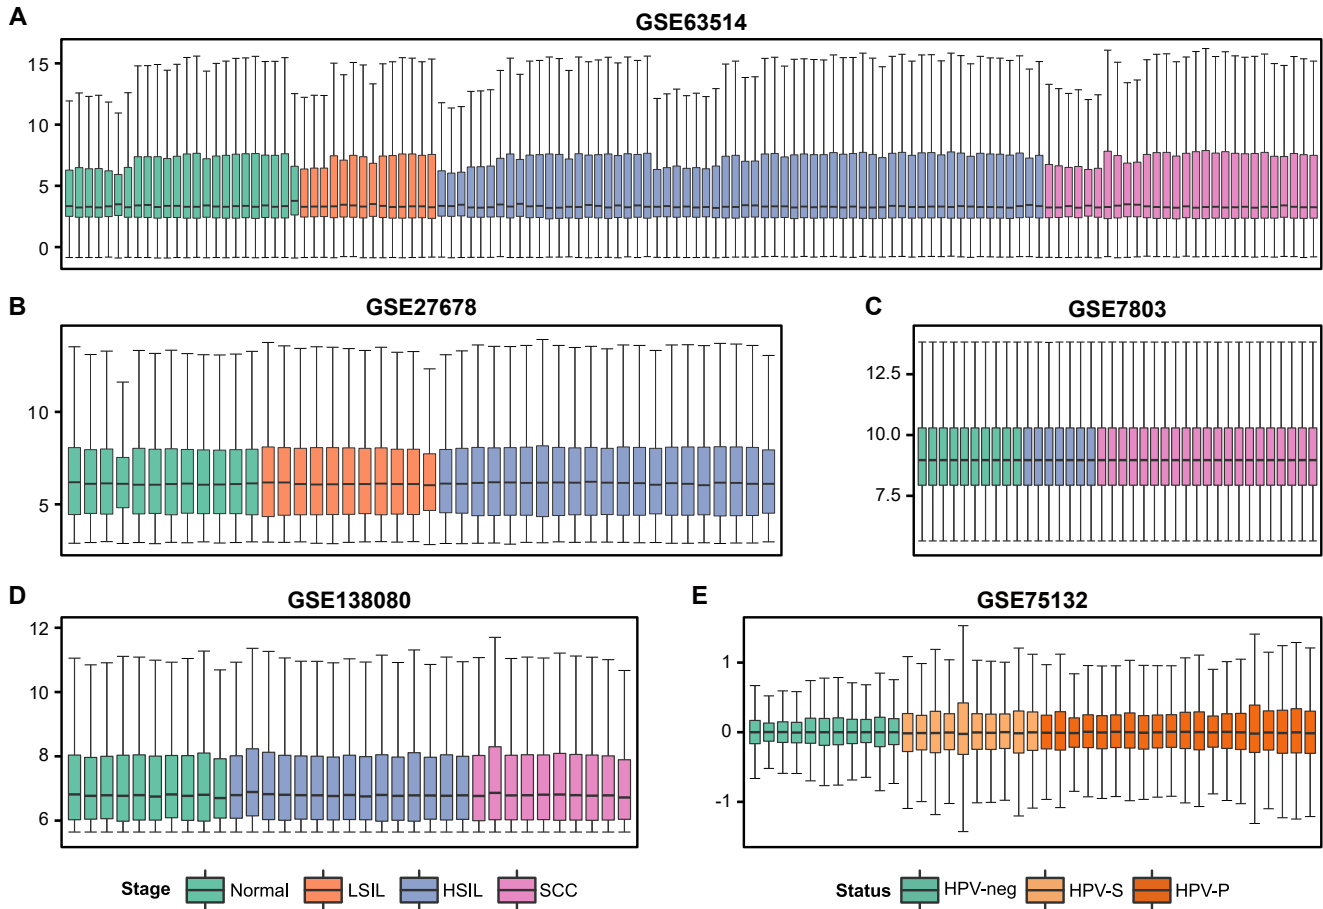

**Figure S1. The quality control of selected datasets. (A-E)** Boxplots of normalized log<sub>2</sub>-transformed expression data extracted from series matrix files of GSE63514, GSE27678, GSE7803, GSE138080 and GSE75132, respectively. The x-axis represents the samples, and the y-axis represents expression values. The black line in the box plot represents the median value of gene expression. LSIL/HSIL, low/high-grade squamous intraepithelial lesions; SCC, cervical squamous cell carcinoma; HPV-S, HPV16 persistent infection without progression; HPV-P, HPV16 persistent infection with progression.

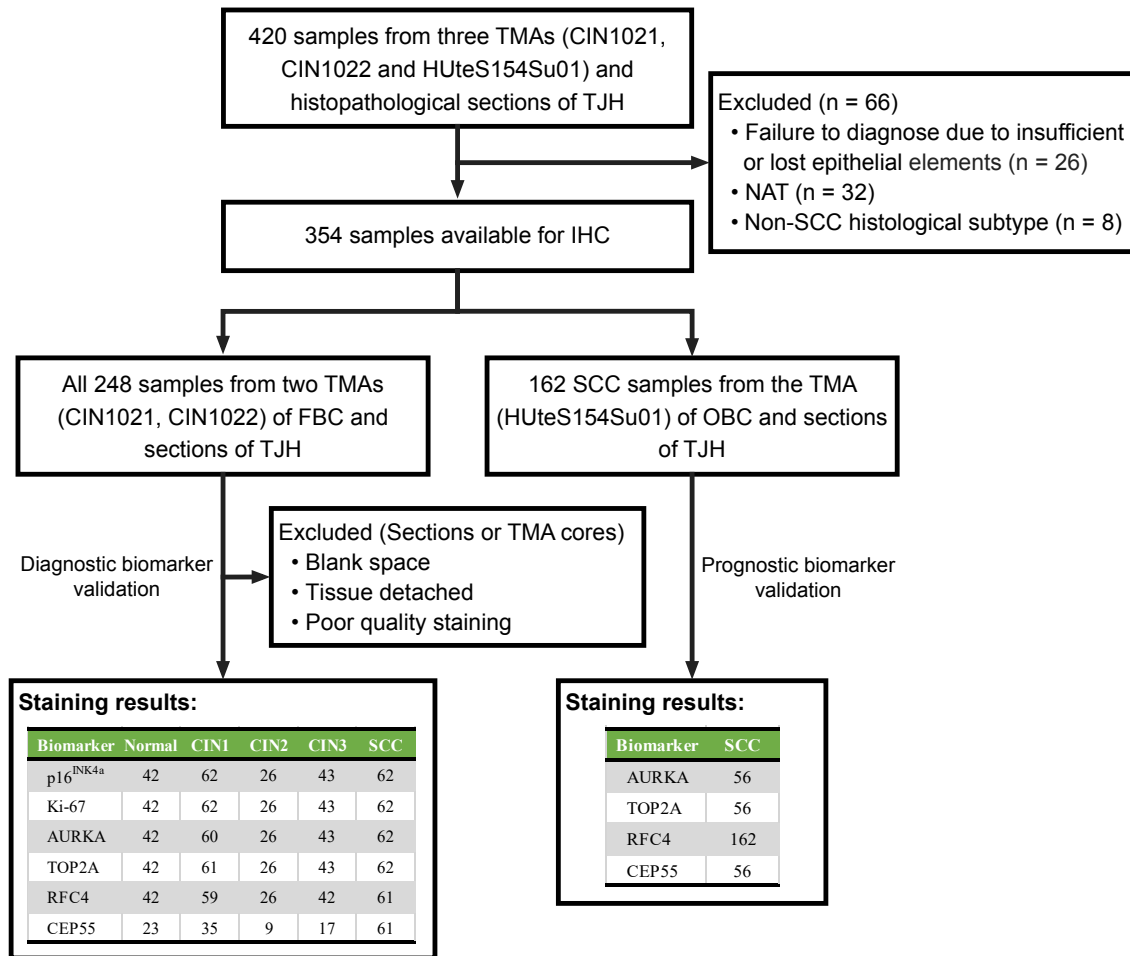

Figure S2. The flow of sample selection and immunohistochemistry (IHC), related to Table S2.

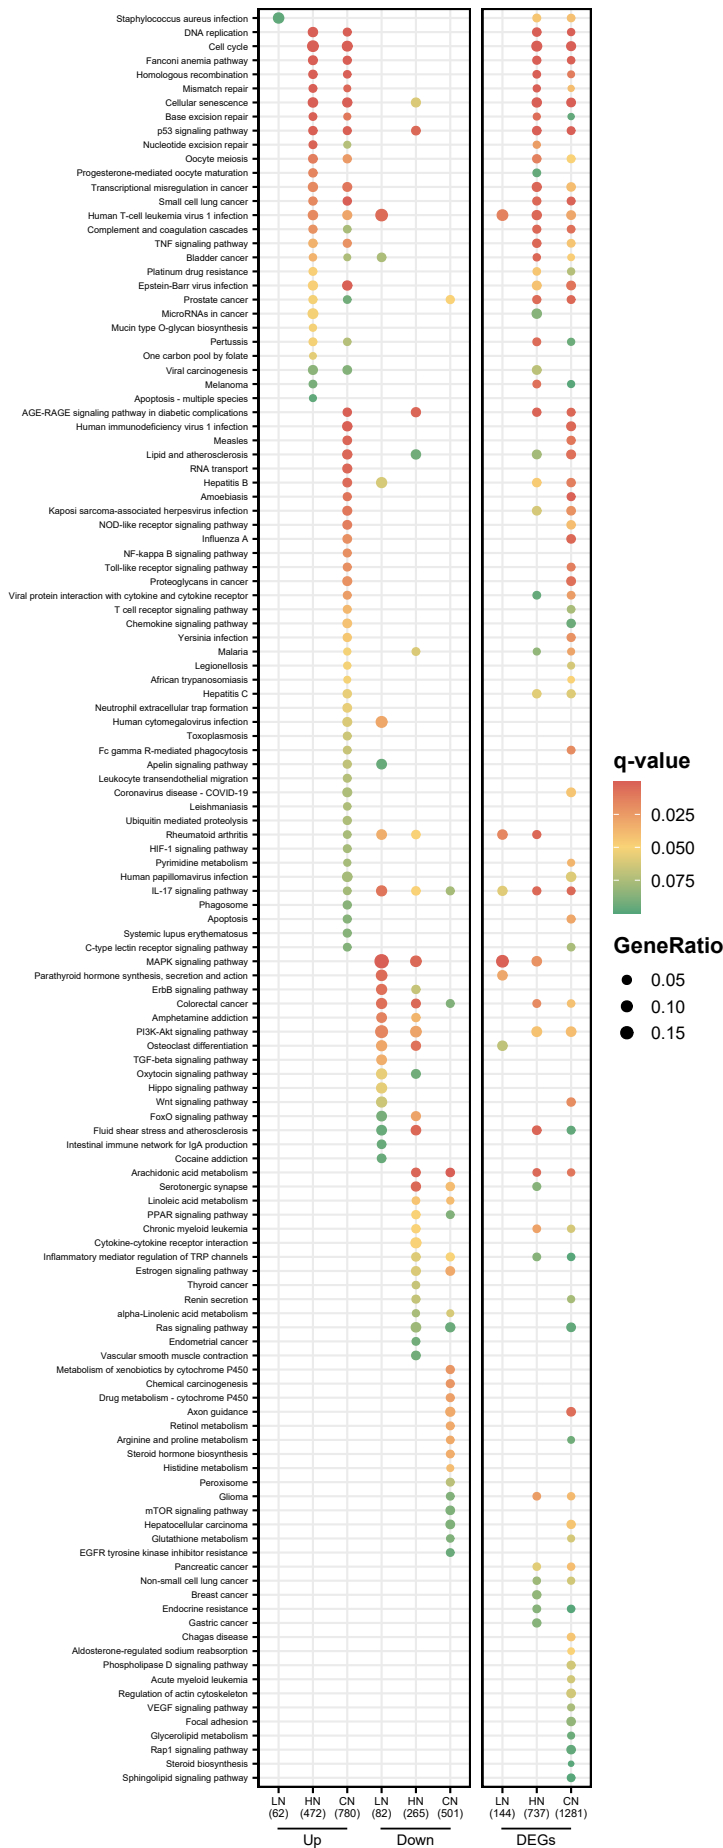

**Figure S3. Pathway enrichment and comparison.** Dot plot showing all significantly enriched KEGG pathways in up- and downregulated genes (Gene Sets1, left panel) and DEGs (right panel) of each comparison group. Dot color indicates the  $q$ -value of the enrichment test; dot size represents the fraction of genes annotated to each pathway.



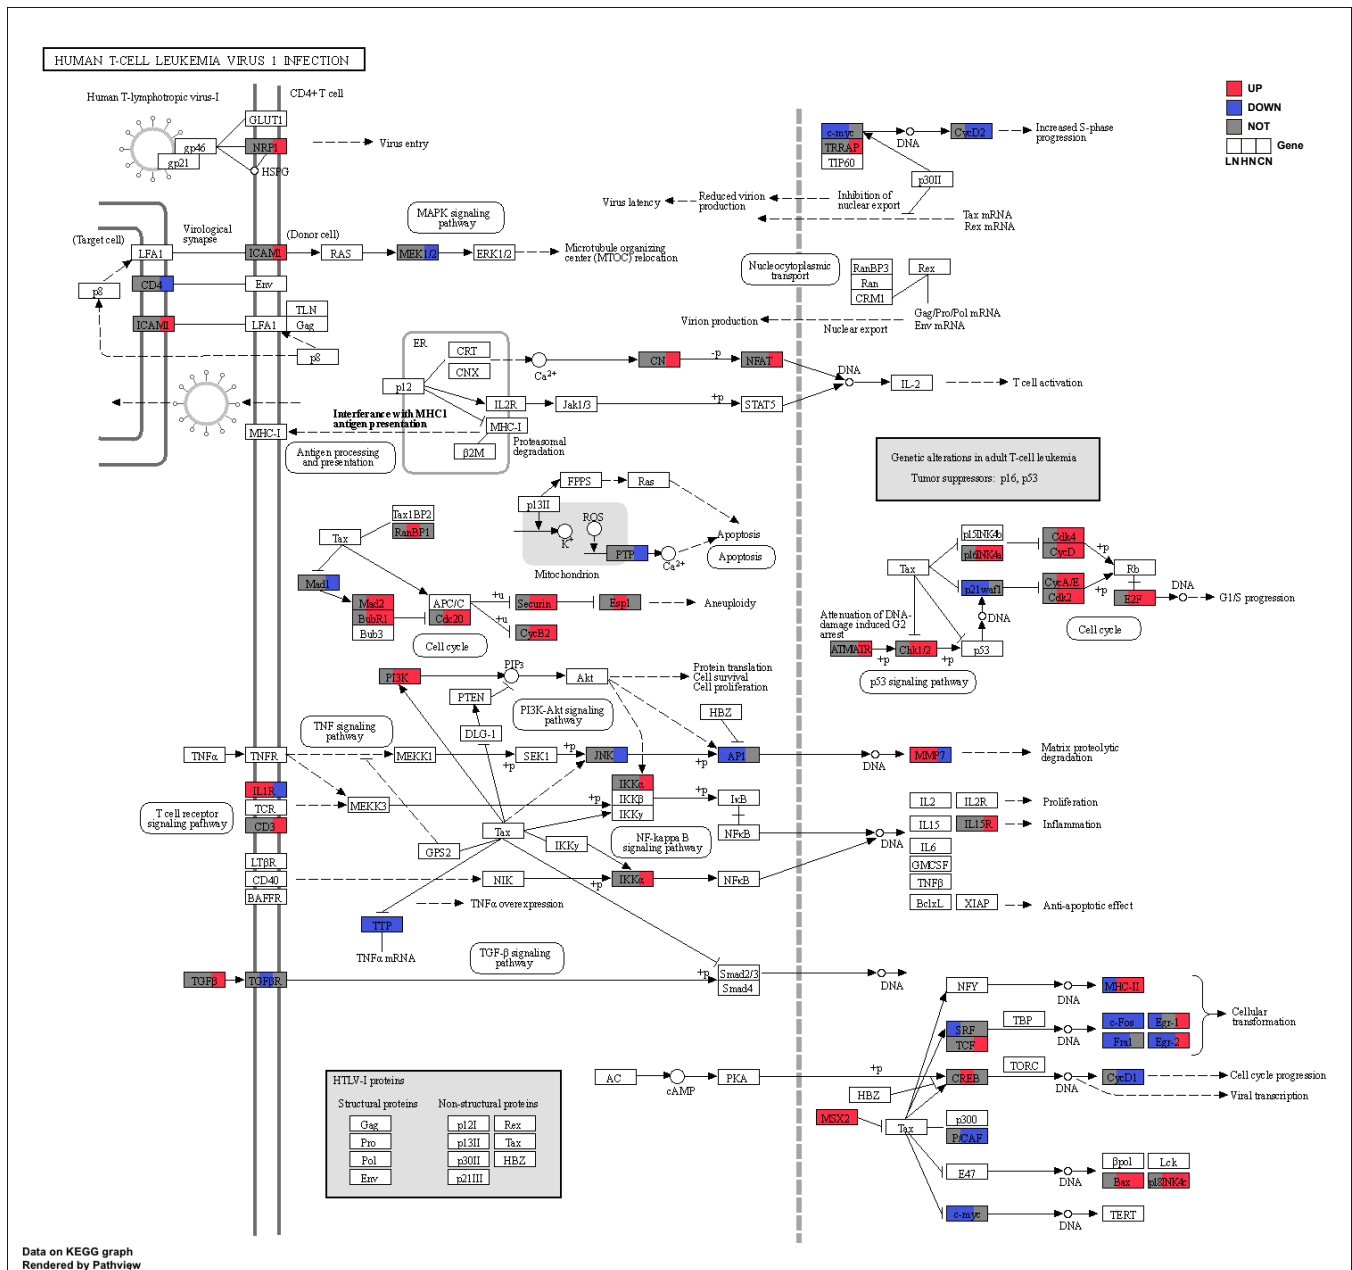

**Figure S4. Human T-cell leukemia virus 1 (HTLV-1) infection signaling pathway map.** Each box is divided into three sub-boxes equally. The color of each sub-box indicates whether the gene is differentially expressed among LN, HN and CN from left to right. Red indicates upregulation, blue indicates downregulation, and grey indicates not significant. Genes that are differentially expressed in at least one group are colored.

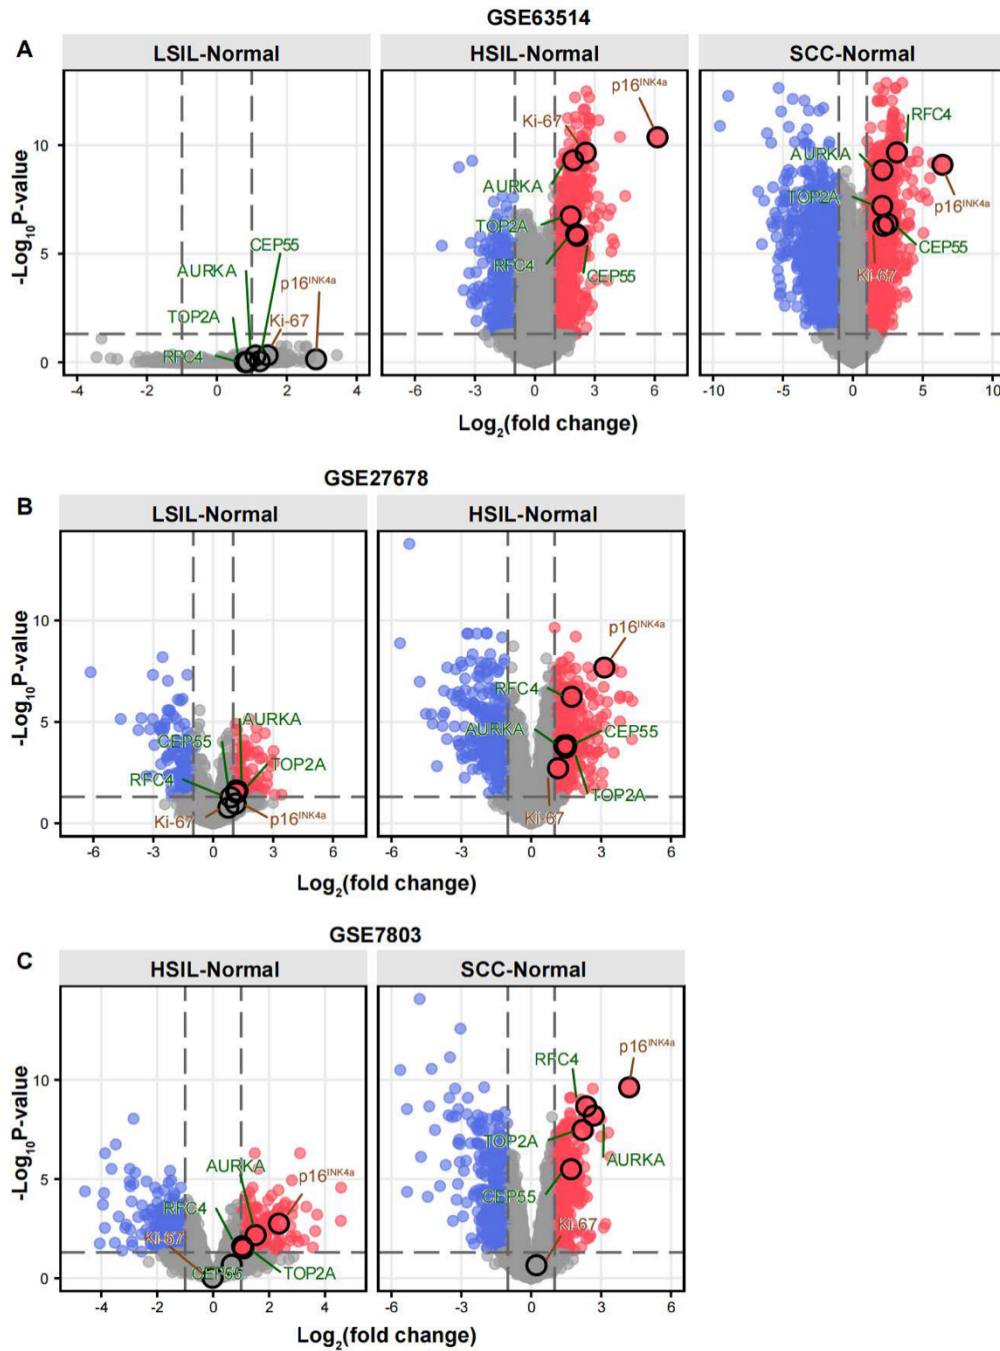

**Figure S5. Differential expression of total genes in each comparison group of the discovery datasets.** Respective volcano plots of (A) GSE63514, (B) GSE27678 and (C) GSE7803. Red and blue dots represent up- and downregulated genes, respectively; grey dots represent non-statistically significant genes. Vertical dashed lines indicate a 2-fold change cutoff in either direction, and horizontal dashed lines indicate an adjusted  $p$ -value cutoff of 0.05.  $p16^{INK4a}$ , Ki-67, and four hub genes are circled and labeled with gene symbols.

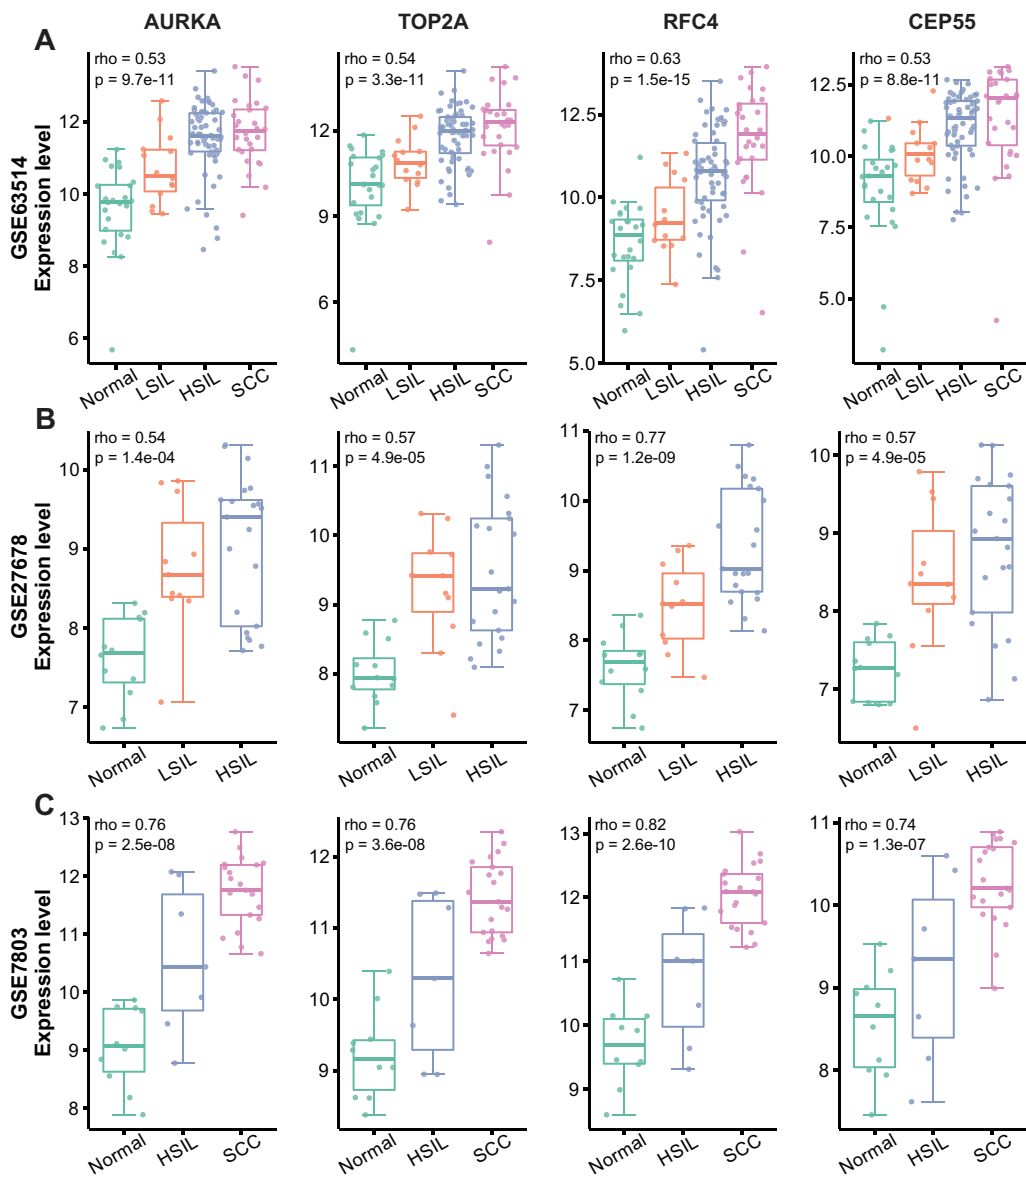

**Figure S6. Correlation between hub gene expression and severity of cervical lesion in the discovery datasets.**

(A-C) Boxplots of hub gene expression according to disease stage, with Spearman's rho and  $p$ -values presented in the upper left corner.

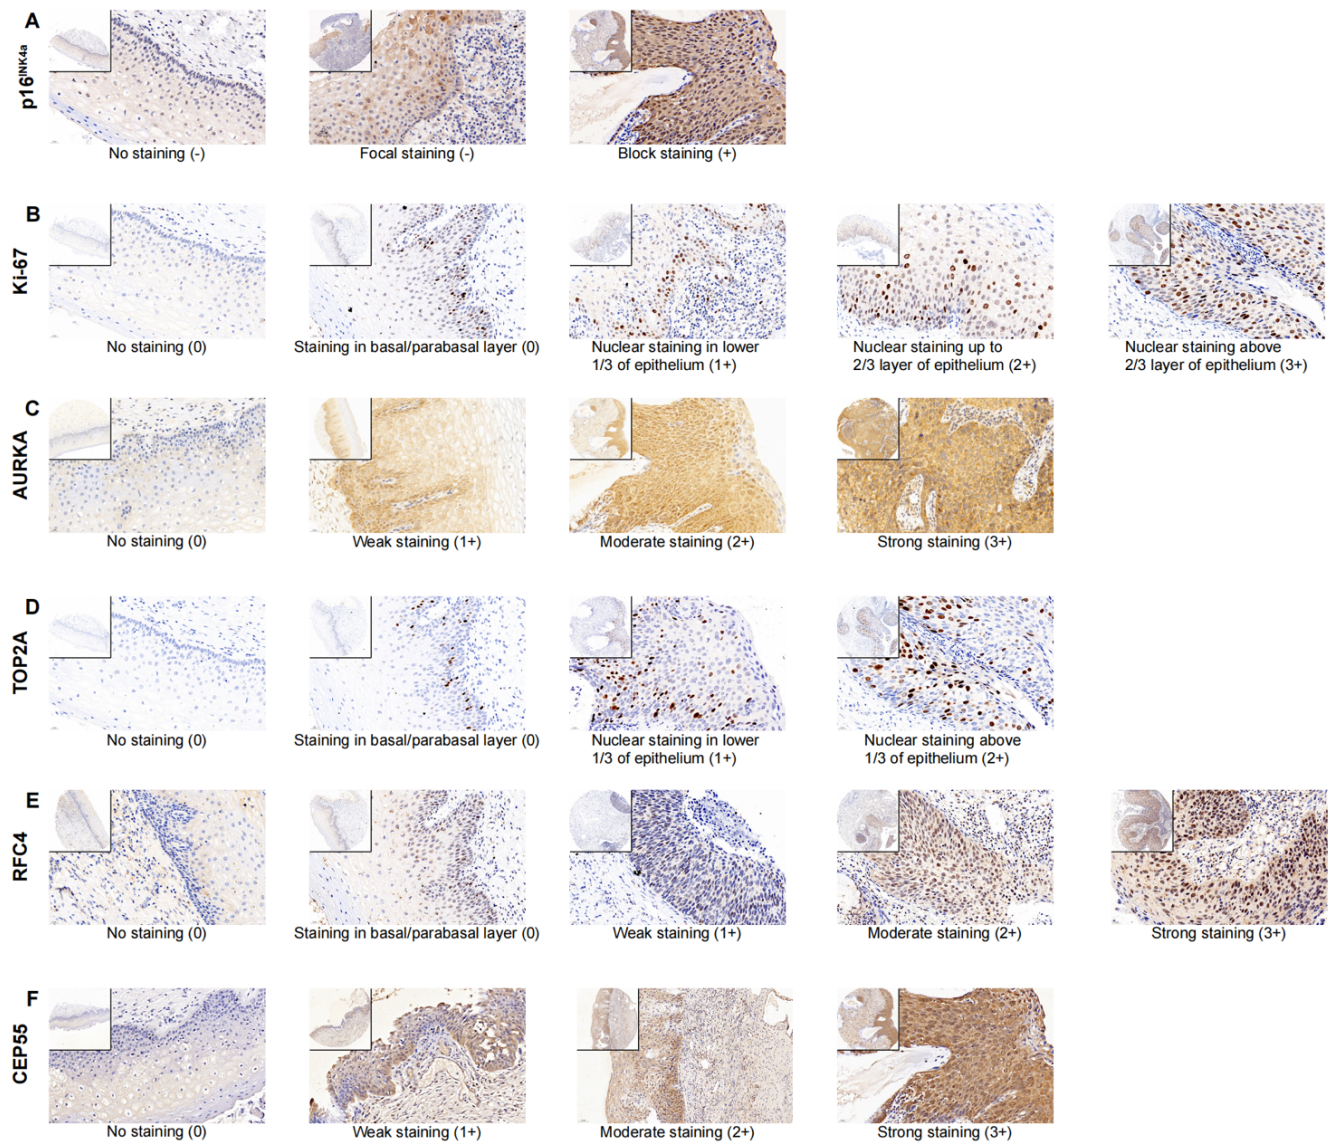

**Figure S7. Schematic diagram of immune scoring criteria, related to Table S5. (A-F) Representative IHC staining patterns of p16<sup>INK4a</sup>, Ki-67, AURKA, TOP2A, RFC4 and CEP55, respectively. Original magnification 400×. Inserts, original magnification 100×.**

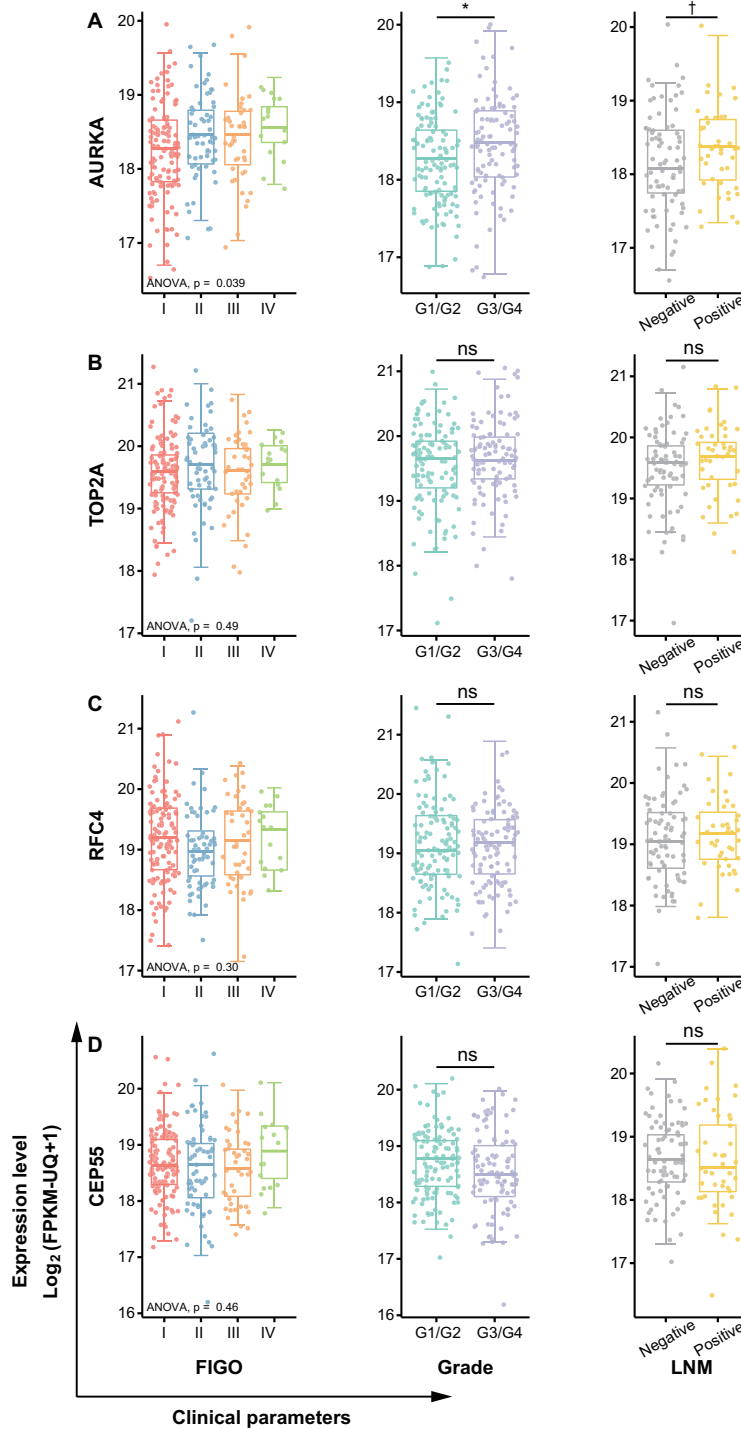

**Figure S8. Assessment of the relationship between hub gene expression and clinical parameters in SCC patients from the TCGA cohort. (A-D) Boxplots showing mRNA expression of hub genes stratified by FIGO stage, histologic grade, and lymph node metastasis (LNM). The x-axis represents clinical parameters, and the y-axis represents the gene expression level. One-way ANOVA test and Student's t-test were applied to each comparison accordingly. \*  $0.01 < p < 0.05$ ; †  $p < 0.1$ ; ns,  $p \geq 0.1$ .**



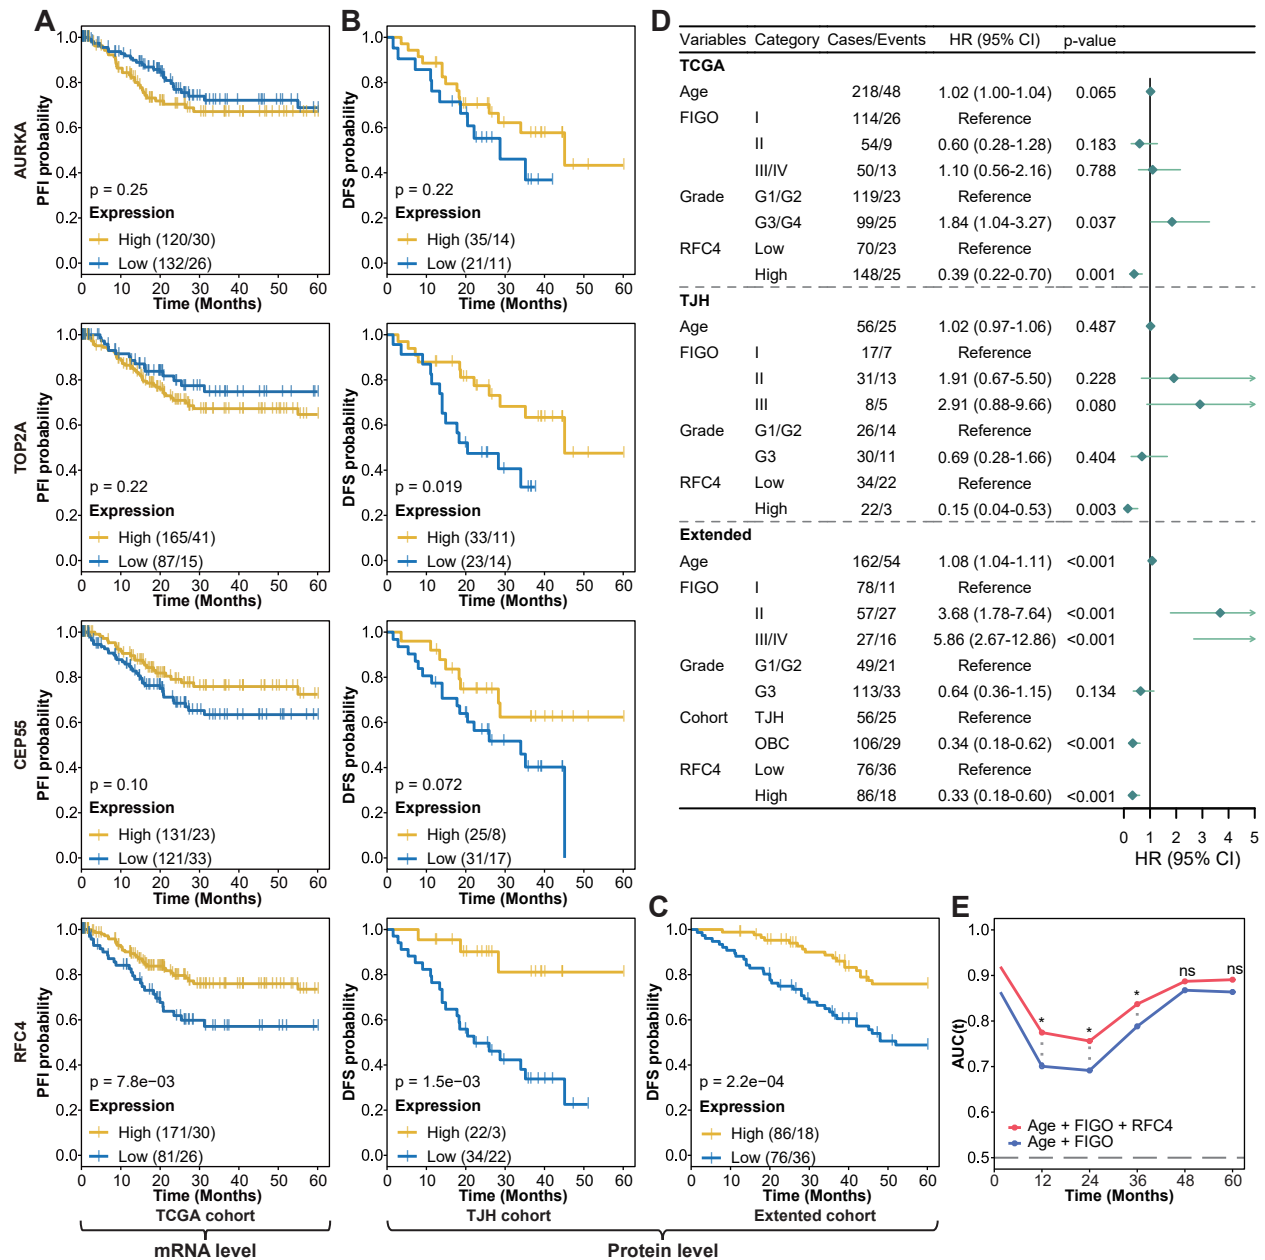

**Figure S9. Univariate and multivariate survival analysis for PFI/DFS in SCC patients, related to Fig. 6.** Five-year Kaplan-curves for PFI/DFS in SCC patients stratified by the hub gene expression (mRNA and protein) from (A) TCGA, (B) TJH and (C) Extended cohorts. The number of cases and events are shown in the plots. The  $p$ -values were calculated with the log-rank test. The optimal cutoff values for HSCORE or staining intensity determined by the *surv\_cutpoint* function from the *survminer* package were 140 for AURKA, 1 (staining intensity) for CEP55, 25 for TOP2A, and 115/110 (TJH/Extended) for RFC4. (D) Forest plot of multivariate Cox regression with clinical features and RFC4 expression taken into account in three cohorts. The main effects are shown as hazard ratios with 95% confidence intervals. (E) Time-dependent AUC for combined RFC4 expression and clinical covariate model (red) and clinical covariate-only model (blue). The significant difference in the AUC was estimated at 1, 2, 3, 4 and 5 years, and adjusted  $p$ -values were calculated. HR, hazard ratio; CI, confidence interval; AUC, area under the ROC curve. \*  $0.01 < p < 0.05$ ; ns,  $p \geq 0.1$ .

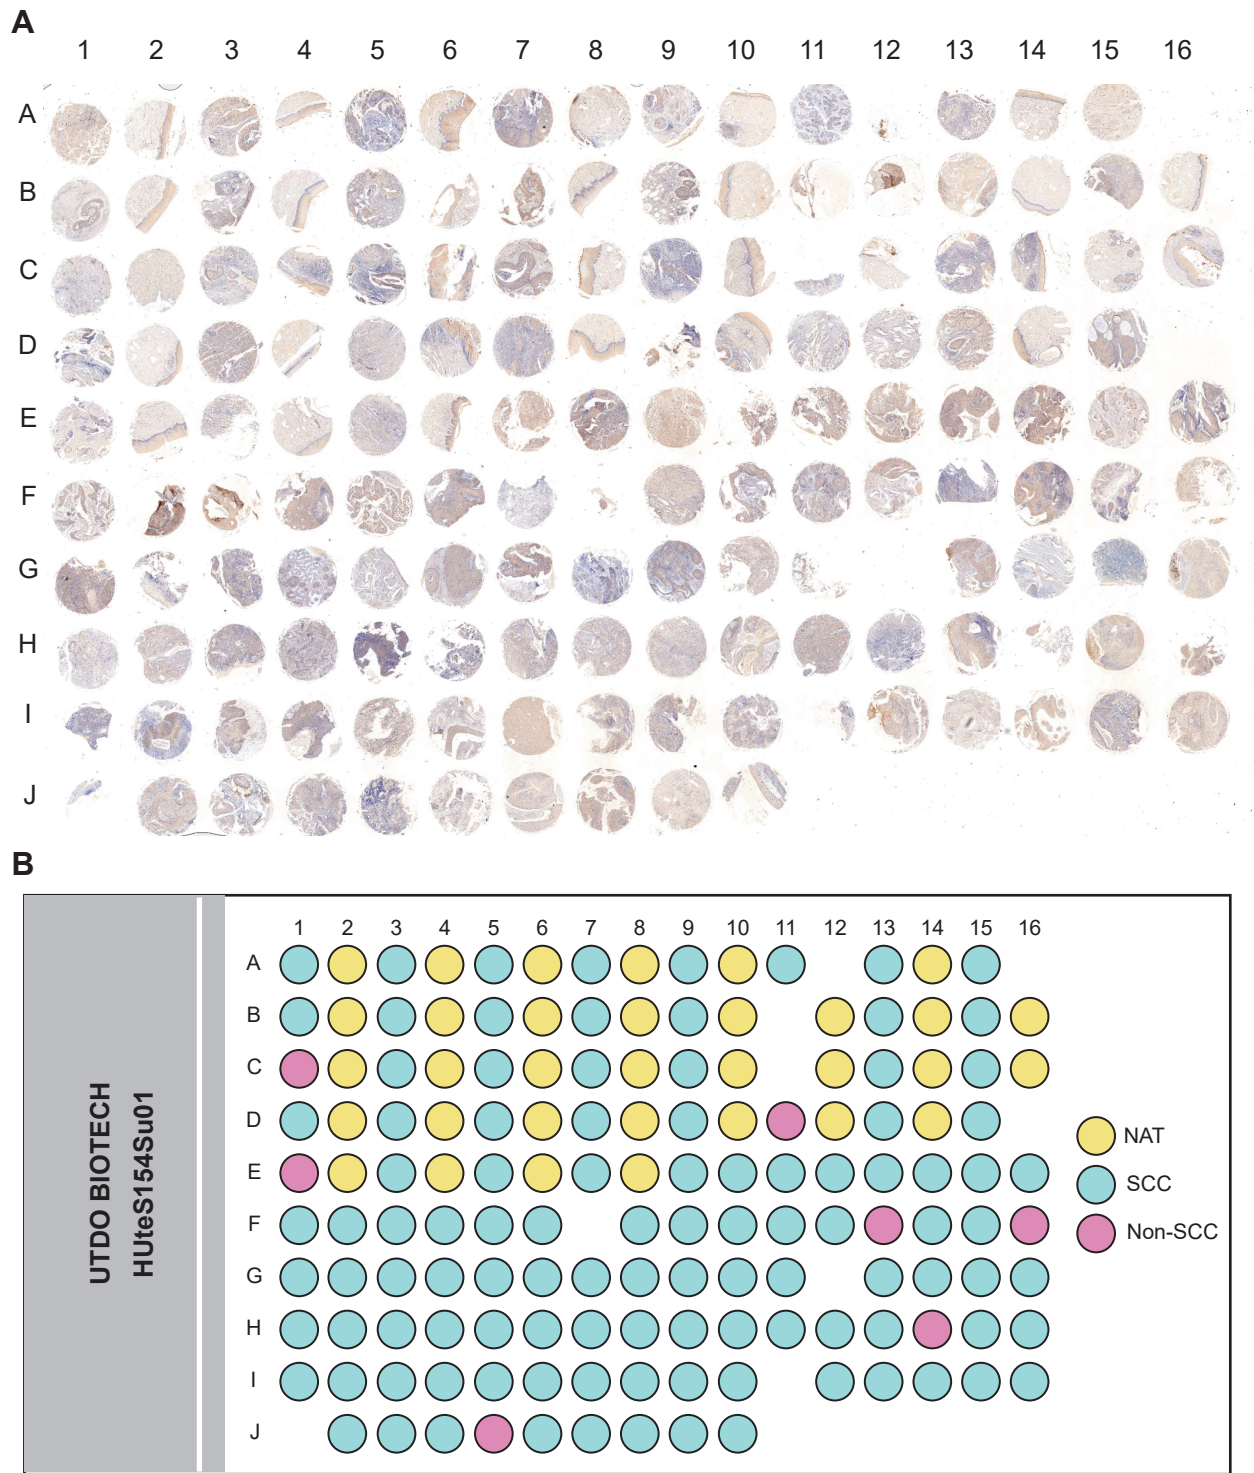

**Figure S10. The illustration of the tissue microarray (HUteS154Su01; TMA) from Outdo Biotech. Co., Ltd. (A) Scanned high-resolution image of the TMA stained for RFC4. (B) Schematic layout of the TMA section. NAT, histologically normal tissue adjacent to the tumor. Non-SCC, non-squamous cell carcinoma of cervix.**

Supplementary Tables 1-6, 10-16

Table S1. Microarray datasets analyzed in this study.

| Dataset               | Year | Platform                        | Country     | Participant         |       |       |     | Type       |
|-----------------------|------|---------------------------------|-------------|---------------------|-------|-------|-----|------------|
|                       |      |                                 |             | Normal <sup>c</sup> | LSIL  | HSIL  | SCC |            |
| GSE63514 <sup>a</sup> | 2015 | HG-U133 Plus 2.0                | USA         | 24                  | 14    | 62    | 28  | Discovery  |
| GSE27678 <sup>b</sup> | 2013 | HG-U133A 2.0                    | UK          | 12                  | 11    | 21    | -   | Discovery  |
| GSE7803               | 2007 | HG-U133A                        | USA         | 10                  | -     | 7     | 21  | Discovery  |
| GSE138080             | 2020 | G4112F (Feature Number version) | Netherlands | 10                  | -     | 15    | 10  | Validation |
|                       |      |                                 |             | HPV-neg             | HPV-S | HPV-P |     |            |
| GSE75132              | 2016 | HG-U133 Plus 2.0                | Germany     | 11                  | 10    | 20    |     | Validation |

<sup>a</sup>GSE63514 contains five types of samples: normal, CIN1, CIN2, CIN3 and SCC. CIN1 was defined as LSIL and CIN2/3 as HSIL.

<sup>b</sup>GSE27678 contains two platforms, and the dataset of HG-U133A 2.0 platform was analyzed.

<sup>c</sup>Of normal tissues, 22 out of 24 and 1 out of 10 samples were HR-HPV positive in GSE63514 and GSE7803 but unknown for GSE27678.

Abbreviations: LSIL/HSIL, low/high-grade squamous intraepithelial lesions; SCC, cervical squamous cell carcinoma; HPV-S, HPV16 persistent infection without progression; HPV-P, HPV16 persistent infection with progression.



**Table S2. Histology information of all tissue specimens, related to Fig. S2.**

| <b>Diagnosis</b>                 | <b>CIN1021<sup>a</sup></b> | <b>CIN1022<sup>a</sup></b> | <b>TJH<sup>b</sup></b> | <b>HUteS154Su01<sup>c</sup></b> | <b>Total</b> |
|----------------------------------|----------------------------|----------------------------|------------------------|---------------------------------|--------------|
| Normal or Cervicitis             | 21                         | 18                         | 3                      | -                               | 42           |
| CIN1                             | 39                         | 23                         | -                      | -                               | 62           |
| CIN2                             | 10                         | 16                         | -                      | -                               | 26           |
| CIN3                             | 18                         | 26                         | 3                      | -                               | 47           |
| Squamous cell carcinoma          | 5                          | 10                         | 56                     | 106                             | 177          |
| Adenocarcinoma                   | 1                          | -                          | -                      | 2                               | 3            |
| Adenosquamous carcinoma          | -                          | -                          | -                      | 4                               | 4            |
| SCNEC mixed with adenocarcinoma  | -                          | -                          | -                      | 1                               | 1            |
| NAT                              | -                          | -                          | -                      | 32                              | 32           |
| Failure to diagnose <sup>d</sup> | 8                          | 9                          | -                      | 9                               | 26           |
| <b>Total</b>                     | <b>102</b>                 | <b>102</b>                 | <b>62</b>              | <b>154</b>                      | <b>420</b>   |

<sup>a</sup>Tissue microarrays (TMAs) CIN1021 and CIN1022 were obtained from Fanpu Biotech. Co., Ltd. (FBC).

<sup>b</sup>The collection of histopathological sections obtained from Tongji Hospital was named TJH.

<sup>c</sup>Tissue microarray HUteS154Su01 was obtained from Outdo Biotech. Co., Ltd. (OBC).

<sup>d</sup>Failure to diagnose was attributed to insufficient or lost epithelial elements.

Abbreviations: CIN, cervical intraepithelial neoplasia; SCNEC, small cell neuroendocrine carcinoma; NAT, histologically normal tissue adjacent to the tumor.

**Table S3. Summary of DEGs and Gene Sets1&2.**

| Dataset           | LSIL-Normal |      | HSIL-Normal |      | SCC-Normal |      | Stepwise genes <sup>a</sup> | Gene Sets2 |
|-------------------|-------------|------|-------------|------|------------|------|-----------------------------|------------|
|                   | UP          | DOWN | UP          | DOWN | UP         | DOWN |                             |            |
| GSE63514          | 0           | 0    | 744         | 316  | 1849       | 1105 | 7885                        | 725        |
| GSE27678          | 113         | 132  | 420         | 296  | -          | -    | 6775                        | 123        |
| GSE7803           | -           | -    | 220         | 244  | 384        | 357  | 4636                        | 121        |
| <b>Gene Sets1</b> | 113         | 132  | 1122        | 626  | 1971       | 1256 | -                           | -          |

<sup>a</sup>Stepwise genes refers to genes gradually increase or decrease in expression with the progression of cervical lesion.

**Table S4. Antibodies used for immunohistochemical staining.**

| Antibody                  | Antigen retrieval | Dilution | Host species        | Vendor (Cat.No.)            |
|---------------------------|-------------------|----------|---------------------|-----------------------------|
| Anti-p16 <sup>INK4a</sup> | EDTA pH 9.0       | 1:100    | Rabbit (monoclonal) | Abcam (ab108349)            |
| Anti-Ki-67                | EDTA pH 9.0       | 1:200    | Mouse (monoclonal)  | Immunoway (YM6189)          |
| Anti-AURKA                | EDTA pH 9.0       | 1:500    | Rabbit (polyclonal) | Abcam (ab1287)              |
| Anti-TOP2A                | EDTA pH 9.0       | 1:2000   | Rabbit (monoclonal) | Abcam (ab52934)             |
| Anti-RFC4                 | EDTA pH 9.0       | 1:500    | Mouse (monoclonal)  | Abcam (ab156780)            |
| Anti-CEP55                | EDTA pH 9.0       | 1:100    | Rabbit (polyclonal) | SinoBiological (200475-T08) |

Abbreviations: EDTA, Ethylenediaminetetraacetic acid.

**Table S5. Immunohistochemical scoring system for noninvasive squamous epithelia.**

| Biomarker            | Location               | IHC score | Criteria                                                                                                                 | Result   |
|----------------------|------------------------|-----------|--------------------------------------------------------------------------------------------------------------------------|----------|
| p16 <sup>INK4a</sup> | Nucleus + Cytoplasm    |           | Staining pattern                                                                                                         |          |
|                      |                        | -         | No staining or focal/sporadic epithelial staining                                                                        | Negative |
|                      |                        | +         | Continuous nuclear staining (diffuse block staining) with or without cytoplasmic reactivity in basal and parabasal layer | Positive |
| Ki-67                | Nucleus                |           | Staining distribution                                                                                                    |          |
|                      |                        | 0         | No staining or staining in basal/parabasal layer                                                                         | Negative |
|                      |                        | 1+        | Nuclear staining in lower 1/3 of epithelium                                                                              | Positive |
|                      |                        | 2+        | Nuclear staining up to 2/3 layer of epithelium                                                                           | Positive |
|                      |                        | 3+        | Nuclear staining above 2/3 layer of epithelium                                                                           | Positive |
| AURKA                | Cytoplasm <sup>a</sup> |           | Staining intensity                                                                                                       |          |
|                      |                        | 0         | No staining                                                                                                              | Negative |
|                      |                        | 1+        | Weak staining                                                                                                            | Negative |
|                      |                        | 2+        | Moderate staining                                                                                                        | Positive |
|                      |                        | 3+        | Strong staining                                                                                                          | Positive |
| TOP2A                | Nucleus                |           | Staining distribution                                                                                                    |          |
|                      |                        | 0         | No staining or staining in basal/parabasal layer                                                                         | Negative |
|                      |                        | 1+        | Nuclear staining in lower 1/3 of epithelium                                                                              | Positive |
|                      |                        | 2+        | Nuclear staining above 1/3 of epithelium                                                                                 | Positive |
| RFC4                 | Nucleus + Cytoplasm    |           | Staining pattern                                                                                                         |          |
|                      |                        | 0         | No staining, staining only in basal/parabasal layer or cytoplasmic-only staining                                         | Negative |
|                      |                        | 1+        | Weak nuclear staining with or without cytoplasmic reactivity                                                             | Negative |
|                      |                        | 2+        | Moderate nuclear staining with or without cytoplasmic reactivity                                                         | Positive |
|                      |                        | 3+        | Strong nuclear staining with or without cytoplasmic reactivity                                                           | Positive |
| CEP55                | Cytoplasm              |           | Staining intensity                                                                                                       |          |
|                      |                        | 0         | No staining                                                                                                              | Negative |
|                      |                        | 1+        | Weak staining                                                                                                            | Negative |
|                      |                        | 2+        | Moderate staining                                                                                                        | Positive |
|                      |                        | 3+        | Strong staining                                                                                                          | Positive |

<sup>a</sup>Nuclear and cytoplasmic staining of AURKA was observed in SCC.

**Table S6. Clinical characteristics of the collected cohorts for survival analysis.**

| Characteristics                                 | TCGA (n = 252)    | TJH (n = 56)      | OBC (n = 106)     |
|-------------------------------------------------|-------------------|-------------------|-------------------|
| Age, years, median (IQR)                        | 47.0 (39.0, 57.2) | 50.5 (43.5, 57.0) | 45.5 (41.0, 52.0) |
| FIGO stage, n (%)                               |                   |                   |                   |
| I                                               | 125 (49.6)        | 17 (30.4)         | 61 (57.5)         |
| II                                              | 62 (24.6)         | 31 (55.4)         | 26 (24.5)         |
| III                                             | 42 (16.7)         | 8 (14.3)          | 18 (17.0)         |
| IV                                              | 16 (6.3)          | 0 (0.0)           | 1 (0.9)           |
| Unknown                                         | 7 (2.8)           | 0 (0.0)           | 0 (0.0)           |
| Histologic grade, n (%)                         |                   |                   |                   |
| G1                                              | 12 (4.8)          | 2 (3.6)           | 0 (0.0)           |
| G2                                              | 109 (43.3)        | 24 (42.9)         | 23 (21.7)         |
| G3                                              | 102 (40.5)        | 30 (53.6)         | 83 (78.3)         |
| G4                                              | 1 (0.4)           | 0 (0.0)           | 0 (0.0)           |
| GX                                              | 20 (7.9)          | 0 (0.0)           | 0 (0.0)           |
| Unknown                                         | 8 (3.2)           | 0 (0.0)           | 0 (0.0)           |
| Lymph node metastasis, n (%)                    |                   |                   |                   |
| Negative                                        | 80 (31.7)         | 35 (62.5)         | 88 (83.0)         |
| Positive                                        | 43 (17.1)         | 21 (37.5)         | 18 (17.0)         |
| Unknown                                         | 129 (51.2)        | 0 (0.0)           | 0 (0.0)           |
| HPV status, n (%)                               |                   |                   |                   |
| Negative                                        | 4 (1.6)           | 4 (7.1)           | 14 (13.2)         |
| Positive                                        | 141 (56.0)        | 18 (32.1)         | 83 (78.3)         |
| Unknown                                         | 107 (42.5)        | 34 (60.7)         | 9 (8.5)           |
| Follow-up, months, median (95% CI) <sup>a</sup> | 27.4 (25.0-33.9)  | 35.7 (26.5-39.1)  | 76.0 (73.0-78.0)  |
| Vital status, n (%)                             |                   |                   |                   |
| Alive                                           | 192 (76.2)        | 40 (71.4)         | 79 (74.5)         |
| Dead                                            | 60 (23.8)         | 16 (28.6)         | 27 (25.5)         |
| Recurrence, n (%)                               |                   |                   |                   |
| Yes                                             | 57 (22.6)         | 25 (44.6)         | 31 (29.2)         |
| No                                              | 195 (77.4)        | 31 (55.4)         | 75 (70.8)         |

<sup>a</sup>Median follow-up time was calculated using reverse Kaplan-Meier method.

Abbreviations: IQR, interquartile range; FIGO, International Federation of Gynecology and Obstetrics; CI, confidence interval.

**Table S10. Summary of the hub gene expression related to cancer progression.**

| Gene  | Type of tumor                                 | Method           | Sample size                                                                                                                        | Expression pattern                                                                      | Refs |
|-------|-----------------------------------------------|------------------|------------------------------------------------------------------------------------------------------------------------------------|-----------------------------------------------------------------------------------------|------|
| AURKA | Cervical squamous cell carcinoma (CSCC)       | IHC              | Total samples (n = 131): 20 normal cervix, 35 CIN3, 76 CSCC                                                                        | Normal < CIN3 = CSCC                                                                    | 1    |
|       | Barrett's adenocarcinoma                      | IHC              | Total samples (n = 112): 25 normal esophageal mucosa, 25 GM, 25 IM, 16 LG-IEN, 11 HG-IEN, 10 Bac                                   | Normal < GM < IM < LG-IEN < HG-IEN < BAc<br>(Increased in higher grade)                 | 2    |
|       | Colorectal carcinoma (CRC)                    | IHC              | Total samples (n = 60): 40 conventional adenomas, 20 ACIC (ACIC-A + ACIC-E)                                                        | Conventional adenoma < ACIC-A < ACIC<br>(Increased in higher grade)                     | 3    |
|       | Colorectal carcinoma                          | qPCR             | Total samples (n = 75): 25 normal colon mucosa, 25 CRAP, 25 CRC                                                                    | Normal < CRAP = CRC                                                                     | 4    |
| TOP2A | Cervical cancer                               | IHC              | Total samples (n = 64): 5 normal cervix, 10 HSIL, 49 cancer                                                                        | Normal < HSIL = Cancer                                                                  | 5    |
|       | Colorectal carcinoma                          | IHC              | Total samples (n = 215): 27 normal mucosa, 72 IBD, 68 adenoma, 48 carcinoma                                                        | Normal < IBD < Carcinoma<br>Normal < Adenoma < Carcinoma<br>(Increased in higher grade) | 6    |
|       | Oral squamous cell carcinoma (OSCC)           | IHC              | Total samples (n = 58): 20 normal oral mucosa, 16 OED, 22 OSCC                                                                     | Normal < OED < OSCC<br>(Increased in higher grade)                                      | 7    |
|       | Barrett's adenocarcinoma                      | IHC              | Total samples (n = 44): 18 NDBO, 13 DBO, 13 Barrett's adenocarcinoma                                                               | NDBO < DBO<br>NDBO < Barrett's denocarcinoma                                            | 8    |
| RFC4  | Cervical squamous cell carcinoma (CSCC)       | Microarray + IHC | Microarray samples (n = 38): 10 normal cervix, 7 HSIL, 21CSCC<br>IHC samples (n = 82): 15 normal cervix, 20 LSIL, 21 HSIL, 26 CSCC | IHC:<br>Normal < CSCC<br>HSIL < CSCC                                                    | 9    |
| CEP55 | Head and neck squamous cell carcinoma (HNSCC) | IHC              | IHC samples (n = 15): 5 normal oral mucosa, 5 oral dysplasia, 5 HNSCC                                                              | Normal < HNSCC < Dysplasia                                                              | 10   |
|       | Colorectal carcinoma                          | WB + IHC         | Total samples (n = 43): 15 noncancerous mucosae, 13 adenoma, 15 CRC                                                                | WB: Normal < CRC<br>IHC: Adenoma < CRC                                                  | 11   |

Abbreviations: CIN, cervical intraepithelial neoplasia; GM, columnar intestinal metaplasia–negative esophageal mucosa [gastric type]; IM, columnar intestinal metaplasia–positive esophageal mucosa; LG-IEN, low-grade intraepithelial neoplasia; HG-IEN, high-grade intraepithelial neoplasia; BAc, Barrett's esophageal adenocarcinoma; ACIC, adenomas containing invasive carcinoma; ACIC-A, ACIC sectors corresponding to adenoma tissue with low- and high-grade dysplasia; ACIC-E, ACIC sectors corresponding to early invasive carcinoma; CRAP, colorectal adenomatous polyp; HSIL: high-grade squamous intraepithelial lesion; IBD, inflammatory bowel disease; OED, oral epithelial dysplasia; NDBO, non-dysplastic Barrett's esophagus; DBO, dysplastic Barrett's esophagus; LSIL, low-grade squamous intraepithelial lesion; WB, western blot.

#### References:

1. Twu NF, Yuan CC, Yen MS, Lai CR, Chao KC, Wang PH, Wu HH, Chen YJ: Expression of Aurora kinase A and B in normal and malignant cervical tissue: High Aurora A kinase expression in squamous cervical cancer. *European Journal of Obstetrics & Gynecology and Reproductive Biology* 2009, 142:57-63.
2. Rugge M, Fassan M, Zaninotto G, Pizzi M, Giacomelli L, Battaglia G, Rizzetto C, Parente P, Ancona E: Aurora kinase A in Barrett's carcinogenesis. *Hum Pathol* 2010, 41:1380-1386.
3. Casorzo L, Dell'Aglio C, Sarotto I, Risio M: Aurora kinase A gene copy number is associated with the malignant transformation of colorectal adenomas but not with the serrated neoplasia progression. *Hum Pathol* 2015, 46:411-418.
4. Kasap E, Gerceker E, Boyacioglu S, Yuceyar H, Yildirm H, Ayhan S, Korkmaz M: The potential role of the NEK6, AURKA, AURKB, and PAK1 genes in adenomatous colorectal polyps and colorectal adenocarcinoma. *Tumour Biol* 2016, 37:3071-3080.

5. Davidson B, Goldberg I, Lerner-Geva L, Gotlieb WH, Ben-Baruch G, Novikov I, Kopolovic J: Expression of topoisomerase II and Ki-67 in cervical carcinoma-clinicopathological study using immunohistochemistry. *Apmis* 2000, 108:209-215.
6. Stromar IK, Jakic-Razumovic J: The value of immunohistochemical determination of topoisomerase IIalpha and Ki67 as markers of cell proliferation and malignant transformation in colonic mucosa. *Appl Immunohistochem Mol Morphol* 2014, 22:524-529.
7. Shamaa AA, Zyada MM, Wagner M, Awad SS, Osman MM, Abdel Azeem AA: The significance of Epstein Barr virus (EBV) & DNA topoisomerase II alpha (DNA-Topo II alpha) immunoreactivity in normal oral mucosa, oral epithelial dysplasia (OED) and oral squamous cell carcinoma (OSCC). *Diagn Pathol* 2008, 3:45.
8. Rossi E, Villanacci V, Bassotti G, Donato F, Festa A, Cengia G, Grisanti S, Cestari R: TOPOIIalpha and HER-2/neu overexpression/amplification in Barrett's oesophagus, dysplasia and adenocarcinoma. *Histopathology* 2010, 57:81-89.
9. Zhai Y, Kuick R, Nan B, Ota I, Weiss SJ, Trimble CL, Fearon ER, Cho KR: Gene expression analysis of preinvasive and invasive cervical squamous cell carcinomas identifies HOXC10 as a key mediator of invasion. *Cancer Res* 2007, 67:10163-10172.
10. Waseem A, Ali M, Odell EW, Fortune F, Teh MT: Downstream targets of FOXM1: CEP55 and HELLS are cancer progression markers of head and neck squamous cell carcinoma. *Oral Oncology* 2010, 46:536-542.
11. Sakai M, Shimokawa T, Kobayashi T, Matsushima S, Yamada Y, Nakamura Y, Furukawa Y: Elevated expression of C10orf3 (chromosome 10 open reading frame 3) is involved in the growth of human colon tumor. *Oncogene* 2006, 25:480-486.

**Table S11. The summary of immunohistochemical scoring results.**

| Biomarker            | Normal |            | CIN1  |           | CIN2  |           | CIN3  |           |
|----------------------|--------|------------|-------|-----------|-------|-----------|-------|-----------|
|                      | Total  | n (%)      | Total | n (%)     | Total | n (%)     | Total | n (%)     |
| p16 <sup>INK4a</sup> |        |            |       |           |       |           |       |           |
| -                    | 42     | 37 (88.1)  | 62    | 27 (43.5) | 26    | 2 (7.7)   | 43    | 3 (7.0)   |
| +                    |        | 5 (11.9)   |       | 35 (56.5) |       | 24 (92.3) |       | 40 (93.0) |
| Ki-67                |        |            |       |           |       |           |       |           |
| 0                    | 42     | 40 (95.2)  | 62    | 42 (67.7) | 26    | 4 (15.4)  | 43    | 2 (4.7)   |
| 1+                   |        | 1 (2.4)    |       | 18 (29.0) |       | 5 (19.2)  |       | 3 (7.0)   |
| 2+                   |        | 1 (2.4)    |       | 2 (3.2)   |       | 16 (61.5) |       | 8 (18.6)  |
| 3+                   |        | 0 (0.0)    |       | 0 (0.0)   |       | 1 (3.8)   |       | 30 (69.8) |
| AURKA                |        |            |       |           |       |           |       |           |
| 0                    | 42     | 21 (50.0)  | 60    | 13 (21.7) | 26    | 3 (11.5)  | 43    | 3 (7.0)   |
| 1+                   |        | 11 (26.2)  |       | 24 (40.0) |       | 1 (3.8)   |       | 4 (9.3)   |
| 2+                   |        | 10 (23.8)  |       | 20 (33.3) |       | 21 (80.8) |       | 19 (44.2) |
| 3+                   |        | 0 (0.0)    |       | 3 (5.0)   |       | 1 (3.8)   |       | 17 (39.5) |
| TOP2A                |        |            |       |           |       |           |       |           |
| 0                    | 42     | 42 (100.0) | 61    | 48 (78.7) | 26    | 6 (23.1)  | 43    | 2 (4.7)   |
| 1+                   |        | 0 (0.0)    |       | 11 (18.0) |       | 4 (15.4)  |       | 1 (2.3)   |
| 2+                   |        | 0 (0.0)    |       | 2 (3.3)   |       | 16 (61.5) |       | 40 (93.0) |
| RFC4                 |        |            |       |           |       |           |       |           |
| 0                    | 42     | 30 (71.4)  | 59    | 32 (54.2) | 26    | 3 (11.5)  | 42    | 3 (7.1)   |
| 1+                   |        | 10 (23.8)  |       | 19 (32.2) |       | 1 (3.8)   |       | 1 (2.4)   |
| 2+                   |        | 2 (4.8)    |       | 8 (13.6)  |       | 15 (57.7) |       | 19 (45.2) |
| 3+                   |        | 0 (0.0)    |       | 0 (0.0)   |       | 7 (26.9)  |       | 19 (45.2) |
| CEP55                |        |            |       |           |       |           |       |           |
| 0                    | 23     | 8 (34.8)   | 35    | 5 (14.3)  | 9     | 0 (0.0)   | 17    | 1 (5.9)   |
| 1+                   |        | 8 (34.8)   |       | 10 (28.6) |       | 2 (22.2)  |       | 1 (5.9)   |
| 2+                   |        | 7 (30.4)   |       | 13 (37.1) |       | 3 (33.3)  |       | 11 (64.7) |
| 3+                   |        | 0 (0.0)    |       | 7 (20.0)  |       | 4 (44.4)  |       | 4 (23.5)  |



**Table S12. Characteristics of studies assessing p16<sup>INK4a</sup>, Ki-67, TOP2A and ProExC immunohistochemically.**

| Refs                           | Total | Non-dysplasia<br>n (%) | CIN1<br>n (%)  | CIN2<br>n (%)  | CIN3<br>n (%)  | Cervical cancer<br>n (%) |
|--------------------------------|-------|------------------------|----------------|----------------|----------------|--------------------------|
| <b>p16<sup>INK4a</sup></b>     |       |                        |                |                |                |                          |
| Murphy 2005 [1]                | 147   | 0/20 (0)               | 38/38 (100)    | 33/33 (100)    | 45/46 (97.8)   | 10/10 (100)              |
| Ishikawa 2006 [2]              | 143   | 0/7 (0)                | 12/37 (32.4)   | 32/39 (82.1)   | 41/44 (93.2)   | 16/16 (100)              |
| Kim 2015 [3]                   | 149   | 0/17 (0)               | 22/31 (71.0)   | 21/25 (84.0)   | 41/41 (100)    | 35/35 (100)              |
| Zhong 2015 [4]                 | 1144  | 72/329 (21.9)          | 307/456 (67.3) | 172/174 (98.9) | 162/163 (99.4) | 22/22 (100)              |
| Chaloob 2015 [5]               | 105   | -                      | 9/24 (37.5)    | 19/28 (67.9)   |                | 50/53 (94.3)             |
| Kanthiya 2016 [6]              | 243   | 5/53 (9.4)             | 11/106 (10.4)  | 48/61 (78.7)   |                | 21/23 (91.3)             |
| <b>Ki-67</b>                   |       |                        |                |                |                |                          |
| Kim 2015 [3]                   | 147   | 0/17 (0)               | 15/30 (50.0)   | 16/25 (64.0)   | 40/40 (100)    | 35/35 (100)              |
| Zhong 2015 [4]                 | 1145  | 101/331 (31.5)         | 359/456 (78.7) | 170/174 (98.7) | 160/162 (98.8) | 22/22 (100)              |
| Kanthiya 2016 [6]              | 243   | 6/53 (11.3)            | 24/106 (22.6)  | 46/61 (75.4)   |                | 23/23 (100)              |
| Howitt 2013 [7]                | 139   | 2/25 (8.0)             | 26/55 (47.3)   | 9/11 (81.8)    | 12/16 (75.0)   | 27/32 (84.4)             |
| Lim 2015 [8]                   | 103   | 0/3 (0)                | 20/48 (41.7)   | 52/52 (100)    |                | -                        |
| Mitildzans 2016 [9]            | 58    | 2/10 (20.0)            | 6/20 (30.0)    | 14/14 (100)    | 14/14 (100)    | -                        |
| <b>TOP2A</b>                   |       |                        |                |                |                |                          |
| Shi 2007 [10]                  | 62    | 0/14 (0)               | 26/34 (76.5)   | 12/14 (85.7)   |                | -                        |
| <b>ProExC (TOP2A and MCM2)</b> |       |                        |                |                |                |                          |
| Shi 2007 [10]                  | 62    | 0/14 (0)               | 32/34 (94.1)   | 11/14 (78.6)   |                | -                        |
| Ozaki 2010 [11]                | 252   | 1/9 (11.1)             | 65/123 (52.8)  | 56/57 (98.2)   | 49/49 (100)    | 14/14 (100)              |
| Yang 2013 [12]                 | 166   | 0/19 (0)               | 27/29 (93.1)   | 35/35 (100)    | 63/63 (100)    | 20/20 (100)              |

**References:**

- Murphy N, Ring M, Heffron C, King B, Killalea AG, Hughes C, Martin CM, McGuinness E, Sheils O, O'Leary JJ: p16(INK4A), CDC6, and MCM5: predictive biomarkers in cervical preinvasive neoplasia and cervical cancer. *Journal of Clinical Pathology* 2005, 58:525-534.
- Ishikawa M, Fujii T, Saito M, Nindl I, Ono A, Kubushiro K, Tsukazaki K, Mukai M, Nozawa S: Overexpression of p16 INK4a as an indicator for human papillomavirus oncogenic activity in cervical squamous neoplasia. *Int J Gynecol Cancer* 2006, 16:347-353.
- Kim TH, Han JH, Shin E, Noh JH, Kim HS, Song YS: Clinical Implication of p16, Ki-67, and Proliferating Cell Nuclear Antigen Expression in Cervical Neoplasia: Improvement of Diagnostic Accuracy for High-grade Squamous Intraepithelial Lesion and Prediction of Resection Margin Involvement on Conization Specimen. *J Cancer Prev* 2015, 20:70-77.
- Zhong P, Li J, Gu Y, Liu Y, Wang A, Sun Y, Lu L: P16 and Ki-67 expression improves the diagnostic accuracy of cervical lesions but not predict persistent high risk human papillomavirus infection with CIN1. *Int J Clin Exp Pathol* 2015, 8:2979-2986.
- Chaloob MK, Hussein AG, Qasim BJ: Correlation of P16 (Ink4a) and CK17 to HPV (16E6+18E6) in Premalignant and Malignant Lesions of Uterine Cervix: A Clinicopathologic Study. *Iran J Pathol* 2016, 11:377-390.
- Kanthiya K, Khunrarong J, Tangjitgamol S, Puripat N, Tanvanich S: Expression of the p16 and Ki67 in Cervical Squamous Intraepithelial Lesions and Cancer. *Asian Pac J Cancer Prev* 2016, 17:3201-3206.
- Howitt BE, Nucci MR, Drapkin R, Crum CP, Hirsch MS: Stathmin-1 expression as a complement to p16 helps identify high-grade cervical intraepithelial neoplasia with increased specificity. *Am J Surg Pathol* 2013, 37:89-97.
- Lim S, Lee MJ, Cho I, Hong R, Lim SC: Efficacy of p16 and Ki-67 immunostaining in the detection of squamous intraepithelial lesions in a high-risk HPV group. *Oncol Lett* 2016, 11:1447-1452.
- Mitildzans A, Arechvo A, Rezeberga D, Isajevs S: Expression of p63, p53 and Ki-67 in Patients with Cervical Intraepithelial Neoplasia. *Turk Patoloji Derg* 2017, 33:9-16.
- Shi J, Liu H, Wilkerson M, Huang Y, Meschter S, Dupree W, Schuerch C, Lin F: Evaluation of p16INK4a, minichromosome maintenance protein 2, DNA topoisomerase II alpha, ProE(x) C, and p16INK4a/ProE(x) C in cervicit squamous intraepithelial lesions. *Human Pathology* 2007, 38:1335-1344.
- Ozaki S, Zen Y, Inoue M: Biomarker expression in cervical intraepithelial neoplasia: potential progression predictive factors for low-grade lesions. *Human Pathology* 2011, 42:1007-1012.
- Yang QC, Zhu Y, Liou HB, Zhang XJ, Shen Y, Ji XH: A Cocktail of Mcm2 and Top2a, P16(Ink4a) and Ki-67 as Biomarkers for the Improved Diagnosis of Cervical Intraepithelial Lesion. *Polish Journal of Pathology* 2013, 64:21-27.

**Table S13. Concordance analysis between IHC biomarkers.**

| Biomarker            | Concordance, Unweighted kappa coefficient (95% CI) |                          |                          |                          |                          |                        |
|----------------------|----------------------------------------------------|--------------------------|--------------------------|--------------------------|--------------------------|------------------------|
|                      | p16 <sup>INK4a</sup>                               | Ki-67                    | AURKA                    | TOP2A                    | RFC4                     | CEP55                  |
| <b>All Stages</b>    |                                                    |                          |                          |                          |                          |                        |
| p16 <sup>INK4a</sup> | 100%, 1.00 (1.00-1.00)                             |                          |                          |                          |                          |                        |
| Ki-67                | 82.6%, 0.62 (0.51-0.71)                            | 100%, 1.00 (1.00-1.00)   |                          |                          |                          |                        |
| AURKA                | 81.1%, 0.57 (0.45-0.68)                            | 82.8%, 0.63 (0.52-0.73)  | 100%, 1.00 (1.00-1.00)   |                          |                          |                        |
| TOP2A                | 82.5%, 0.63 (0.53-0.73)                            | 90.2%, 0.80 (0.72-0.87)  | 82.8%, 0.64 (0.54-0.74)  | 100%, 1.00 (1.00-1.00)   |                          |                        |
| RFC4                 | 80.0%, 0.58 (0.47-0.68)                            | 84.3%, 0.68 (0.57-0.76)  | 82.2%, 0.63 (0.54-0.74)  | 86.5%, 0.73 (0.63-0.82)  | 100%, 1.00 (1.00-1.00)   |                        |
| CEP55                | 83.4%, 0.60 (0.44-0.74)                            | 77.2%, 0.48 (0.32-0.62)  | 83.4%, 0.59 (0.44-0.73)  | 75.9%, 0.47 (0.33-0.60)  | 79.6%, 0.55 (0.40-0.68)  | 100%, 1.00 (1.00-1.00) |
| <b>HSIL</b>          |                                                    |                          |                          |                          |                          |                        |
| p16 <sup>INK4a</sup> | 100%, 1.00 (1.00-1.00)                             |                          |                          |                          |                          |                        |
| Ki-67                | 92.8%, 0.51 (-0.03-0.85)                           | 100%, 1.00 (1.00-1.00)   |                          |                          |                          |                        |
| AURKA                | 88.4%, 0.44 (0.11-0.74)                            | 89.9%, 0.54 (0.19-0.80)  | 100%, 1.00 (1.00-1.00)   |                          |                          |                        |
| TOP2A                | 89.9%, 0.41 (-0.03-0.74)                           | 97.1%, 0.84 (0.55-1.00)  | 87.0%, 0.45 (0.11-0.72)  | 100%, 1.00 (1.00-1.00)   |                          |                        |
| RFC4                 | 86.8%, 0.24 (-0.08-0.57)                           | 82.4%, 0.05 (-0.13-0.36) | 80.9%, 0.21 (-0.09-0.50) | 82.4%, 0.15 (-0.12-0.45) | 100%, 1.00 (1.00-1.00)   |                        |
| CEP55                | 84.6%, 0.41 (-0.14-0.83)                           | 84.6%, 0.41 (-0.10-0.86) | 84.6%, 0.51 (0.00-0.88)  | 84.6%, 0.41 (-0.12-0.86) | 84.0%, 0.40 (-0.12-0.87) | 100%, 1.00 (1.00-1.00) |

**Table S14. Sensitivity, specificity, PPV, NPV, and AUC of six IHC biomarkers for detecting HSIL and HSIL+.**

| <b>Biomarker</b>     | <b>Sensitivity<br/>(95% CI), %</b> | <b>Specificity<br/>(95% CI), %</b> | <b>PPV<br/>(95% CI), %</b> | <b>NPV<br/>(95% CI), %</b> | <b>AUC (95% CI)</b> |
|----------------------|------------------------------------|------------------------------------|----------------------------|----------------------------|---------------------|
| <b>HSIL</b>          |                                    |                                    |                            |                            |                     |
| p16 <sup>INK4a</sup> | 92.8 (83.9-97.6)                   | 61.5 (51.5-70.9)                   | 61.5 (51.5-70.9)           | 92.8 (83.9-97.6)           | 0.77 (0.72-0.83)    |
| Ki-67                | 91.3 (82.0-96.7)                   | 78.8 (69.7-86.2)                   | 74.1 (63.5-83.0)           | 93.2 (85.7-97.5)           | 0.85 (0.80-0.90)    |
| AURKA                | 84.1 (73.3-91.8)                   | 67.6 (57.7-76.6)                   | 63.7 (53.0-73.6)           | 86.2 (76.7-92.9)           | 0.76 (0.70-0.82)    |
| TOP2A                | 88.4 (78.4-94.9)                   | 87.4 (79.4-93.1)                   | 82.4 (71.8-90.3)           | 91.8 (84.5-96.4)           | 0.88 (0.83-0.93)    |
| RFC4                 | 88.2 (78.1-94.8)                   | 90.1 (82.5-95.1)                   | 85.7 (75.3-92.9)           | 91.9 (84.7-96.4)           | 0.89 (0.84-0.94)    |
| CEP55                | 84.6 (65.1-95.6)                   | 53.4 (39.9-66.7)                   | 44.9 (30.7-59.8)           | 88.6 (73.3-96.8)           | 0.69 (0.59-0.79)    |
| <b>HSIL+</b>         |                                    |                                    |                            |                            |                     |
| p16 <sup>INK4a</sup> | 95.4 (90.3-98.3)                   | 61.5 (51.5-70.9)                   | 75.8 (68.5-82.1)           | 91.4 (82.3-96.8)           | 0.78 (0.73-0.84)    |
| Ki-67                | 93.1 (87.4-96.8)                   | 78.8 (69.7-86.2)                   | 84.7 (77.8-90.2)           | 90.1 (82.1-95.4)           | 0.86 (0.81-0.90)    |
| AURKA                | 91.6 (85.5-95.7)                   | 67.6 (57.7-76.6)                   | 78.4 (71.1-84.7)           | 86.2 (76.7-92.9)           | 0.80 (0.74-0.85)    |
| TOP2A                | 91.6 (85.5-95.7)                   | 87.4 (79.4-93.1)                   | 90.2 (83.9-94.7)           | 89.1 (81.3-94.4)           | 0.89 (0.85-0.93)    |
| RFC4                 | 91.5 (85.3-95.7)                   | 90.1 (82.5-95.1)                   | 92.2 (86.1-96.2)           | 89.2 (81.5-94.5)           | 0.91 (0.87-0.95)    |
| CEP55                | 89.7 (81.3-95.2)                   | 53.4 (39.9-66.7)                   | 74.3 (64.8-82.3)           | 77.5 (61.5-89.2)           | 0.72 (0.64-0.79)    |

**Table S15. Comparison of positive rates of single and combined IHC biomarkers in different cervical lesions (based on sections with p16<sup>INK4a</sup>, Ki-67, TOP2A and RFC4 evaluated simultaneously).**

| Biomarker                                         | Results  | Normal<br>(n = 42) | CIN1<br>(n = 59) | CIN2<br>(n = 26) | CIN3<br>(n = 42) | SCC<br>(n = 61) |
|---------------------------------------------------|----------|--------------------|------------------|------------------|------------------|-----------------|
| p16 <sup>INK4a</sup> , n (%)                      | Negative | 37 (88.1)          | 27 (45.8)        | 2 (7.7)          | 3 (7.1)          | 1 (1.6)         |
|                                                   | Positive | 5 (11.9)           | 32 (54.2)        | 24 (92.3)        | 39 (92.9)        | 60 (98.4)       |
| Ki-67, n (%)                                      | Negative | 40 (95.2)          | 41 (69.5)        | 4 (15.4)         | 2 (4.8)          | 3 (4.9)         |
|                                                   | Positive | 2 (4.8)            | 18 (30.5)        | 22 (84.6)        | 40 (95.2)        | 58 (95.1)       |
| p16 <sup>INK4a</sup> + Ki-67 <sup>a</sup> , n (%) | Negative | 42 (100)           | 46 (78.0)        | 4 (15.4)         | 4 (9.5)          | 4 (6.6)         |
|                                                   | Positive | 0 (0)              | 13 (22.0)        | 22 (84.6)        | 38 (90.5)        | 57 (93.4)       |
| TOP2A, n (%)                                      | Negative | 42 (100)           | 46 (78.0)        | 6 (23.1)         | 2 (4.8)          | 3 (4.9)         |
|                                                   | Positive | 0 (0)              | 13 (22.0)        | 20 (76.9)        | 40 (95.2)        | 58 (95.1)       |
| RFC4, n (%)                                       | Negative | 40 (95.2)          | 51 (86.4)        | 4 (15.4)         | 4 (9.5)          | 3 (4.9)         |
|                                                   | Positive | 2 (4.8)            | 8 (13.6)         | 22 (84.6)        | 38 (90.5)        | 58 (95.1)       |

<sup>a</sup>Both p16<sup>INK4a</sup> and Ki-67 positive.

**Table S16. Diagnostic performance of serial and parallel interpretation of IHC biomarker combinations for detecting HSIL and HSIL+ compared to TOP2A and RFC4 alone.**

**a. HSIL**

| Biomarker                    | Sensitivity (95% CI), % | <i>p</i> -value <sup>a</sup> | Specificity (95% CI), % | <i>p</i> -value <sup>a</sup> | PPV (95% CI), %  | NPV (95% CI), %   | AUC (95% CI)     |
|------------------------------|-------------------------|------------------------------|-------------------------|------------------------------|------------------|-------------------|------------------|
| <b>Single-Refs</b>           |                         |                              |                         |                              |                  |                   |                  |
| TOP2A                        | 88.2 (78.1-94.8)        | Ref/1.000                    | 87.1 (79.0-93.0)        | Ref/0.579                    | 82.2 (71.5-90.2) | 91.7 (84.2-96.3)  | 0.88 (0.83-0.93) |
| RFC4                         | 88.2 (78.1-94.8)        | 1.000/Ref                    | 90.1 (82.5-95.1)        | 0.579/Ref                    | 85.7 (75.3-92.9) | 91.9 (84.7-96.4)  | 0.89 (0.84-0.94) |
| <b>Serial</b>                |                         |                              |                         |                              |                  |                   |                  |
| p16 <sup>INK4A</sup> + Ki-67 | 88.2 (78.1-94.8)        | 1.000/1.000                  | 87.1 (79.0-93.0)        | 1.000/0.579                  | 82.2 (71.5-90.2) | 91.7 (84.2-96.3)  | 0.88 (0.83-0.93) |
| p16 <sup>INK4A</sup> + TOP2A | 85.3 (74.6-92.7)        | 0.480/0.773                  | 89.1 (81.3-94.4)        | 0.480/1.000                  | 84.1 (73.3-91.8) | 90.0 (82.4-95.1)  | 0.87 (0.82-0.92) |
| p16 <sup>INK4A</sup> + RFC4  | 83.8 (72.9-91.6)        | 0.546/0.248                  | 93.1 (86.2-97.2)        | 0.114/0.248                  | 89.1 (78.8-95.5) | 89.5 (82.0-94.7)  | 0.88 (0.83-0.94) |
| Ki-67 + TOP2A                | 88.2 (78.1-94.8)        | NA <sup>b</sup> /1.000       | 90.1 (82.5-95.1)        | 0.248/1.000                  | 85.7 (75.3-92.9) | 91.9 (84.7-96.4)  | 0.89 (0.84-0.94) |
| Ki-67 + RFC4                 | 80.9 (69.5-89.4)        | 0.131/0.074                  | 94.1 (87.5-97.8)        | 0.046/0.134                  | 90.2 (79.8-96.3) | 88.0 (80.3-93.4)  | 0.87 (0.82-0.93) |
| TOP2A + RFC4                 | 79.4 (67.9-88.3)        | 0.041/0.041                  | 95.0 (88.8-98.4)        | 0.013/0.074                  | 91.5 (81.3-97.2) | 87.3 (79.6-92.9)  | 0.87 (0.82-0.93) |
| <b>Parallel</b>              |                         |                              |                         |                              |                  |                   |                  |
| p16 <sup>INK4A</sup> + Ki-67 | 95.6 (87.6-99.1)        | 0.074/0.182                  | 56.4 (46.2-66.3)        | <0.001/<0.001                | 59.6 (49.8-68.9) | 95.0 (86.1-99.0)  | 0.76 (0.71-0.81) |
| p16 <sup>INK4A</sup> + TOP2A | 95.6 (87.6-99.1)        | 0.074/0.182                  | 61.4 (51.2-70.9)        | <0.001/<0.001                | 62.5 (52.5-71.8) | 95.4 (87.1-99.0)  | 0.78 (0.73-0.84) |
| p16 <sup>INK4A</sup> + RFC4  | 97.1 (89.8-99.6)        | 0.077/0.041                  | 60.4 (50.2-70.0)        | <0.001/<0.001                | 62.3 (52.3-71.5) | 96.8 (89.0-99.6)  | 0.79 (0.74-0.84) |
| Ki-67 + TOP2A                | 91.2 (81.8-96.7)        | 0.480/0.773                  | 77.2 (67.8-85.0)        | 0.004/0.009                  | 72.9 (62.2-82.0) | 92.9 (85.1-97.3)  | 0.84 (0.79-0.90) |
| Ki-67 + RFC4                 | 98.5 (92.1-100.0)       | 0.023/0.023                  | 76.2 (66.7-84.1)        | 0.015/<0.001                 | 73.6 (63.3-82.3) | 98.7 (93.1-100.0) | 0.87 (0.83-0.92) |
| TOP2A + RFC4                 | 97.1 (89.8-99.6)        | 0.041/0.041                  | 82.2 (73.3-89.1)        | 0.074/0.013                  | 78.6 (68.3-86.8) | 97.6 (91.8-99.7)  | 0.90 (0.85-0.94) |

<sup>a</sup>Exact McNemar's test comparing to TOP2A and RFC4.

<sup>b</sup>No discordant pairs present.

**b. HSIL+**

| Biomarker                    | Sensitivity (95% CI), % | <i>p</i> -value <sup>a</sup> | Specificity (95% CI), % | <i>p</i> -value <sup>a</sup> | PPV (95% CI), %  | NPV (95% CI), %   | AUC (95% CI)     |
|------------------------------|-------------------------|------------------------------|-------------------------|------------------------------|------------------|-------------------|------------------|
| <b>Single-Refs</b>           |                         |                              |                         |                              |                  |                   |                  |
| TOP2A                        | 91.5 (85.3-95.7)        | Ref/1.000                    | 87.1 (79.0-93.0)        | Ref/0.579                    | 90.1 (83.6-94.6) | 88.9 (81.0-94.3)  | 0.89 (0.85-0.93) |
| RFC4                         | 91.5 (85.3-95.7)        | 1.000/Ref                    | 90.1 (82.5-95.1)        | 0.579/Ref                    | 92.2 (86.1-96.2) | 89.2 (81.5-94.5)  | 0.91 (0.87-0.95) |
| <b>Serial</b>                |                         |                              |                         |                              |                  |                   |                  |
| p16 <sup>INK4A</sup> + Ki-67 | 90.7 (84.3-95.1)        | 1.000/1.000                  | 87.1 (79.0-93.0)        | 1.000/0.579                  | 90.0 (83.5-94.6) | 88.0 (80.0-93.6)  | 0.89 (0.85-0.93) |
| p16 <sup>INK4A</sup> + TOP2A | 89.1 (82.5-93.9)        | 0.248/0.646                  | 89.1 (81.3-94.4)        | 0.480/1.000                  | 91.3 (84.9-95.6) | 86.5 (78.4-92.4)  | 0.89 (0.85-0.93) |
| p16 <sup>INK4A</sup> + RFC4  | 88.4 (81.5-93.3)        | 0.480/0.134                  | 93.1 (86.2-97.2)        | 0.114/0.248                  | 94.2 (88.4-97.6) | 86.2 (78.3-92.1)  | 0.91 (0.87-0.94) |
| Ki-67 + TOP2A                | 89.1 (82.5-93.9)        | 0.248/0.663                  | 90.1 (82.5-95.1)        | 0.248/1.000                  | 92.0 (85.8-96.1) | 86.7 (78.6-92.5)  | 0.90 (0.86-0.94) |
| Ki-67 + RFC4                 | 85.3 (78.0-90.9)        | 0.080/0.013                  | 94.1 (87.5-97.8)        | 0.046/0.134                  | 94.8 (89.1-98.1) | 83.3 (75.2-89.7)  | 0.90 (0.86-0.94) |
| TOP2A + RFC4                 | 84.5 (77.1-90.3)        | 0.008/0.008                  | 95.0 (88.8-98.4)        | 0.013/0.074                  | 95.6 (90.1-98.6) | 82.8 (74.6-89.1)  | 0.90 (0.86-0.94) |
| <b>Parallel</b>              |                         |                              |                         |                              |                  |                   |                  |
| p16 <sup>INK4A</sup> + Ki-67 | 97.7 (93.4-99.5)        | 0.013/0.043                  | 56.4 (46.2-66.3)        | <0.001/<0.001                | 74.1 (66.9-80.5) | 95.0 (86.1-99.0)  | 0.77 (0.72-0.82) |
| p16 <sup>INK4A</sup> + TOP2A | 97.7 (93.4-99.5)        | 0.013/0.043                  | 61.4 (51.2-70.9)        | <0.001/<0.001                | 76.4 (69.1-82.6) | 95.4 (87.1-99.0)  | 0.80 (0.75-0.84) |
| p16 <sup>INK4A</sup> + RFC4  | 98.4 (94.5-99.8)        | 0.016/0.008                  | 60.4 (50.2-70.0)        | <0.001/<0.001                | 76.0 (68.8-82.3) | 96.8 (89.0-99.6)  | 0.79 (0.75-0.84) |
| Ki-67 + TOP2A                | 95.3 (90.2-98.3)        | 0.074/0.302                  | 77.2 (67.8-85.0)        | 0.004/0.009                  | 84.2 (77.3-89.7) | 92.9 (85.1-97.3)  | 0.86 (0.82-0.91) |
| Ki-67 + RFC4                 | 99.2 (95.8-100.0)       | 0.004/0.004                  | 76.2 (66.7-84.1)        | 0.015/<0.001                 | 84.2 (77.4-89.6) | 98.7 (93.1-100.0) | 0.88 (0.83-0.92) |
| TOP2A + RFC4                 | 98.4 (94.5-99.8)        | 0.008/0.008                  | 82.2 (73.3-89.1)        | 0.074/0.013                  | 87.6 (81.1-92.5) | 97.6 (91.8-99.7)  | 0.90 (0.86-0.94) |

<sup>a</sup>Exact McNemar's test comparing to TOP2A and RFC4.
